# Supplementary material for: Tagging moisture sources with Lagrangian and inertial tracers:Application to intense atmospheric river events
Source: Copernicus journal article supplement (doi:10.5194/esd-2018-8), 2018-02-16
Supplement: Supplementary file [file esd-2018-8-AC1-supplement.pdf]

We would like to thank both reviewers for their valuable comments and critics that we tried to take into account in the revised version of the manuscript. Hopefully, all the major and minor corrections pointed out by the reviewers have been corrected now. A detailed answer follows below. We provide replies to the reviewers' comments in bold. As well, corrections included in the manuscript are marked in red.

## Answer to Referee 1

**(...) For example, is it worth to use for AR climatology analysis, or whether the results support the use of IVT for forecasting? The manuscript still needs more effort in the presentation of results and their interpretation, the recommendation is to make a detailed revision of the manuscript to include major corrections, re-write the sections and improve the analysis.**

With regard to the first question raised by the reviewer: In this manuscript we show that active tracers can explain the transport of the moisture better than classic Lagrangian ones. Nevertheless, this is not intended to identify ARs themselves. Thus, conclusions obtained in this analysis had no meaning unless the objective is to analyze the origin of the moisture/advection, but nothing related to create a climatology of the phenomenon, or to replace the use of IVT in the large variety of algorithms of detection proposed in the literature.

In order to follow the recommendations given by the referee, we have improved the description of the events and the interpretation of the results. We have included a supplementary material which addressed some concepts which were unclear. Referees can find all the improvements highlighted in red color.

## SPECIFIC COMMENTS

**The introduction requires a more coherent structure; it provides an introduction to AR, briefly introduces the case analysis and jumps to the introduction of analysis methods to finally include the role of tropical moisture exports for AR. As it is now is disorganized and hard to read. I suggest to rewrite the introduction with a better defined structure e.g. a) ARs (what they are, how they benefit from tropical moisture and why are important in terms of heavy rainfall), b) analysis methods and key previous results and c) what new approach is proposed in the study. Section 2 is well written, the methods are described in very good detail to ensure reproducibility. I recommend to include a section to present the case analyses, a formal synoptic description of the events and if possible information of the effect (e.g. rainfall accumulated and rainfall rate during the AR life cycle) so that this piece of information can be considered for the analysis of the results. Figure 1-3 are poorly described and that may affect the interpretation of the results or at least their relevance.**

The introduction gives a synopsis of the main findings of atmospheric rivers in the literature.

Next, some discussion has been added concerning the tropical moisture export for the AR and the main concerns related to the source of water vapor feeding the rivers. It follows an explanation of the two AR events used in this paper. Supplementary information has also been added including precipitation rates and the 500 hPa geopotential height for both events. This information helps to better understand the ARs behavior. Finally, the section ends with a description of the existing methods and published papers, Lagrangian and Eulerian, to track moisture in the atmosphere. A glimpse of the inertial tracer model compared to the Lagrangian model is also explained there.

**Paragraph 20: Explain why tagged moisture is lost quickly from the pure Lagrangian model and what implication this have on the representation of the AR evolution.**

This is a good question. Both models, Lagrangian and inertial, have the same moist convection and condensation parameterizations (see Section 2). Thus, the difference between both results is due to the forces acting on the particle. The Lagrangian tracers just follow the streamlines, while the active tracers are accelerated due to different forces acting on them. Thus, vertical motion is not the same for both models. As a consequence, we suggest that Lagrangian particles suffer an overestimation of the vertical displacement leading to a rapid moisture loss.

**Orographic ascend is a good mechanism to explain the fast moisture decrease for the Pacific case, however this mechanism is not comparable for the Atlantic, since the land configuration is very different and the pressure effect caused by the US topography is absent for the Atlantic case. Which mechanism is proposed for the Atlantic case?**

We agree with the referee that orographic ascent is enhanced in the Pacific case when compared to the Atlantic one (added to the text). However, orographic ascent is also a key mechanism in the Atlantic coast of the Iberian Peninsula (Eiras-Barca, 2017). This, added to the natural wind ascent of the lead part of the AR associated to the low, explains the condensation of the moisture.

**Conclusions section is rather poor, the main result reported is a finding known from a previous research and it is not clear what is new from the present manuscript. The discussion lacks explanations on processes or how the results might provide new tools for climatology ARs analysis or even forecast support. The entire section must be re-written and pinpoint the main findings with a better justification.**

We are not sure to understand properly the first statement of the referee. As far as we know there are no previous simulations using active tracers instead of Lagrangian ones to track atmospheric moisture. However, we agree with the reviewer that probably we did not emphasize well enough these findings, so we have re-written the section.
